# Supplementary material for: Quantum-dot sensitized hierarchical NiO p–n heterojunction for effective photocatalytic performance
Source: Royal Society of Chemistry journal article supplement (doi:10.1039/d2ra05657g), 2022-01-01
Supplement: d2ra05657g1.pdf [file d2ra05657g1.pdf]

## Quantum-dot Sensitized hierarchical NiO p-n heterojunction for effective photocatalytic performance

Junaid Khan<sup>1</sup>, Gohar Ali<sup>2</sup>, Ayesha Samreen<sup>1</sup>, Shahbaz Ahmad<sup>3,4</sup>, Sarfraz Ahmad<sup>5</sup>, Mehmet Egilmez<sup>3,4\*</sup>, Sadiq Amin<sup>6</sup>, Nadia Khan<sup>7</sup>

<sup>1</sup>Department of Physics, University of Peshawar, Peshawar, Pakistan

<sup>2</sup>Department of Materials Science and Chemical Engineering, Hanyang University, Ansan, 15588, Republic of Korea

<sup>3</sup>Department of Physics, American University of Sharjah, Sharjah, United Arab Emirates

<sup>4</sup>Materials Science and Engineering Program, College of Arts and Sciences, American University of Sharjah, Sharjah, United Arab Emirates

<sup>5</sup>Department of Mathematics, Abbottabad University of Science and Technology, Abbottabad, 22500, Pakistan

<sup>6</sup>Material Research Laboratory, Department of Physics, University of Peshawar 25120, Pakistan<sup>7</sup> Department of Physics, Khushal Khan Khattak University, Karak 27200, Khyber-Pakhtunkhwa Pakistan

\*Corresponding author: Mehmet Egilmez, E-mail: [megilmez@aus.edu](mailto:megilmez@aus.edu)

**Keywords:** Hierarchical NiO, CdS QDs, p-n Heterojunction; Dye-degradation

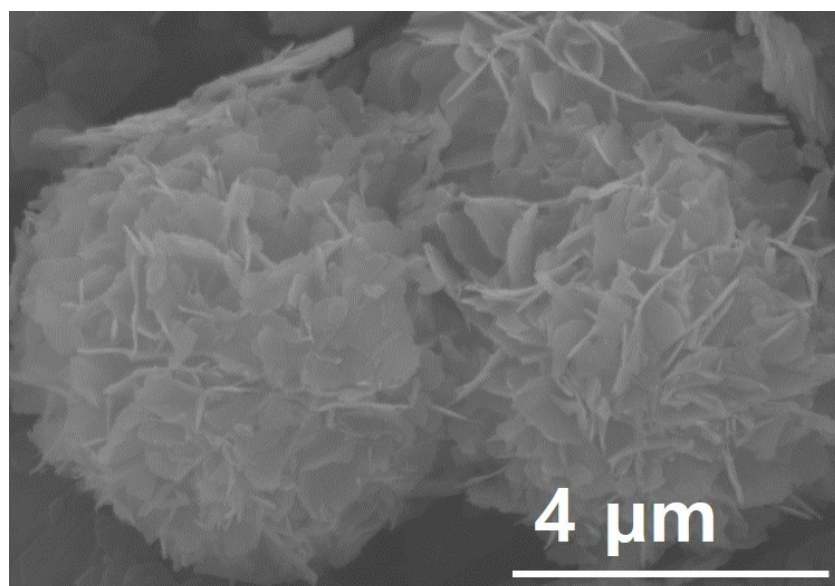

**Fig. S1:** (a) Scanning electron microscopic image of pristine hierarchical NiO.

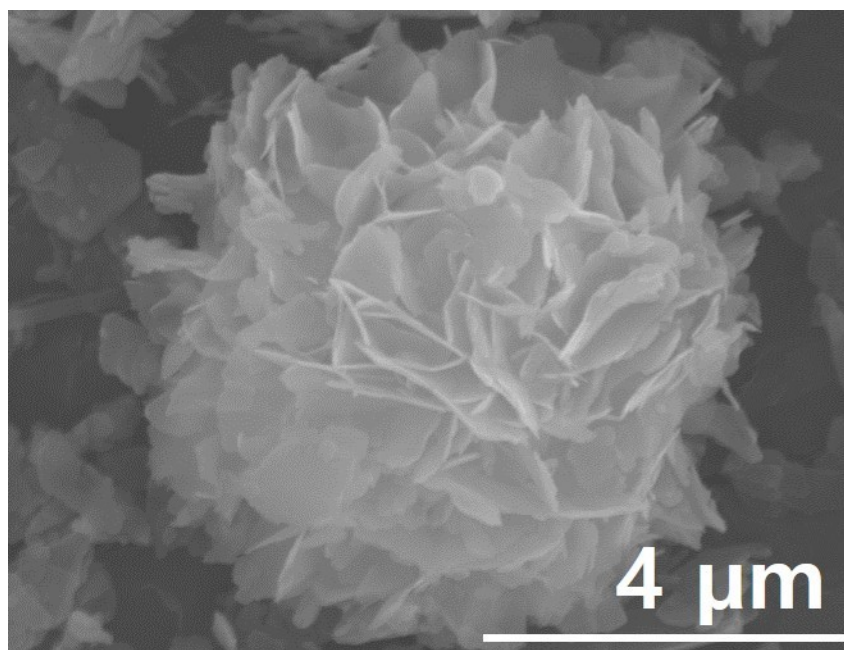

Fig. S2: (a) Scanning electron microscopic image of hierarchical NiO/CdS heterojunction.

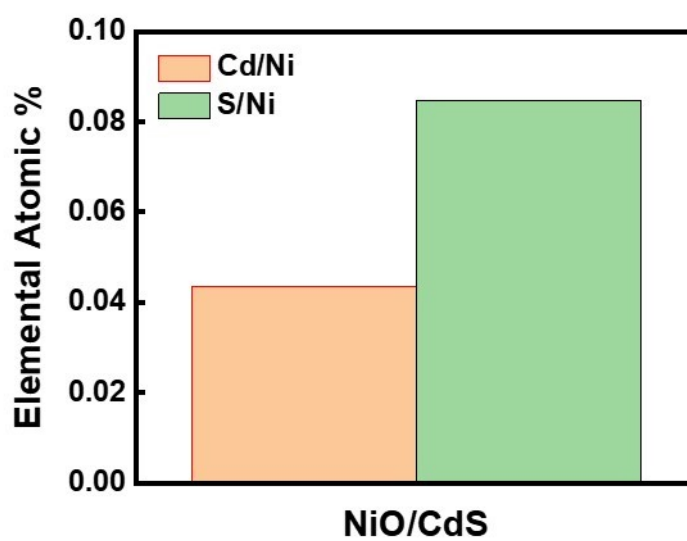

Fig. S3 : EDS-based quantitative comparison for Cd/Ni and S/Ni for CdS/NiO by atomic percent.

### NiO\_CdS

| # | Phase ID  | Chemical Formula | PDF-#       | RIR  | FOM (n)  | Scale(I) | Shift(x) | Space Group | a (Å)  | b (Å)  | c (Å)  |
|---|-----------|------------------|-------------|------|----------|----------|----------|-------------|--------|--------|--------|
| 1 | Bunsenite | NiO              | 98-000-0133 | 5.19 | 0.9 (05) | 0.940    | 0.020°   | cFm3m (225) | 4.1780 | 4.1780 | 4.1780 |

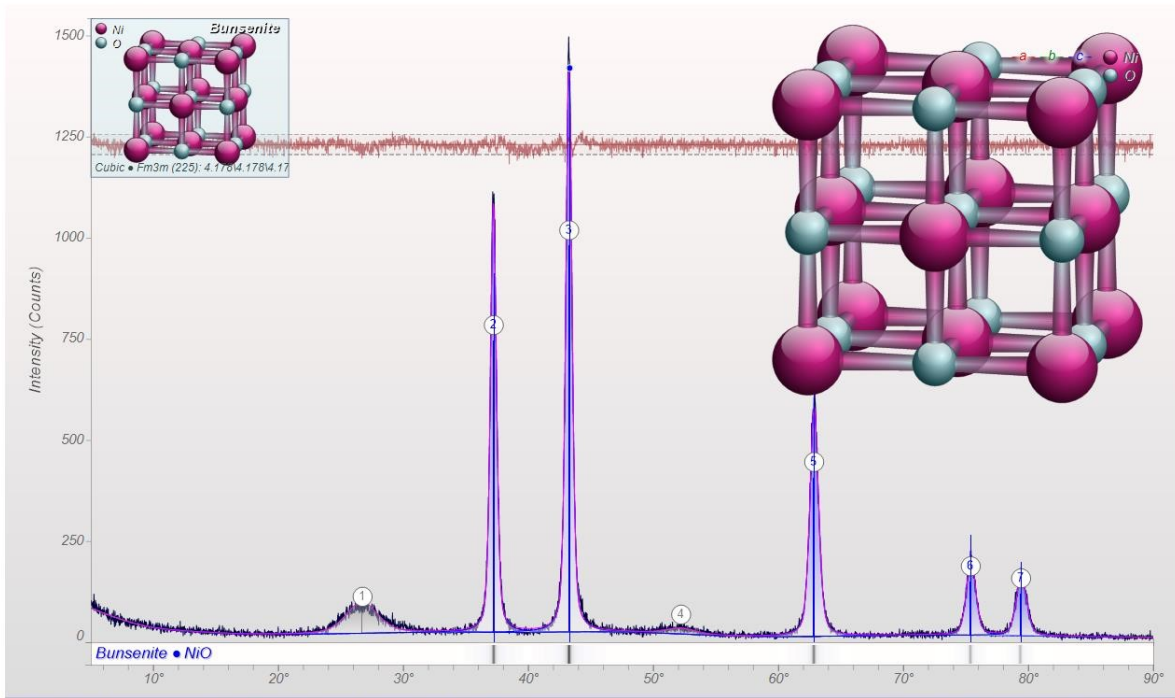

[D:\data\hanyang\PTJ\20210610\NiO\_CdS.raw] 5.0°/90.0°/0.02°/0.3(s), I(p)=1498.0/4.0, Cu(40kV,100mA)

Thursday, June 10, 2021, 2:38 PM • Hanyang University

NiO\_CdS

| # | Angle(°)       | d(Å)            | Centroid | Centroid | BG   | Height      | H/σ   | Area(α1)    | Area(α1)%    | A/σ   | S/L(1.0) | Shape* | FWHM(°)       | XS(Å) | (h k l) | Pha  |
|---|----------------|-----------------|----------|----------|------|-------------|-------|-------------|--------------|-------|----------|--------|---------------|-------|---------|------|
| 1 | 26.687 (0.018) | 3.3376 (0.0045) | 26.687°  | 3.3376Å  | 23.0 | 52.0 (0.6)  | 84.9  | 194.7 (2.9) | 28.1 (0.4)%  | 66.4  | 0.0283   | 0.488v | 3.000 (0.022) | 27    |         |      |
| 2 | 37.186 (0.002) | 2.4159 (0.0002) | 37.186°  | 2.4159Å  | 25.5 | 721.2 (4.0) | 179.9 | 514.9 (3.7) | 74.3 (0.5)%  | 139.0 | 0.0283   | 0.488v | 0.559 (0.002) | 158   | (1 1 1) | Buns |
| 3 | 43.217 (0.001) | 2.0917 (0.0001) | 43.217°  | 2.0917Å  | 26.4 | 954.7 (4.5) | 210.3 | 692.9 (4.3) | 100.0 (0.6)% | 159.3 | 0.0283   | 0.488v | 0.570 (0.002) | 158   | (2 0 0) | Buns |
| 4 | 52.168 (0.067) | 1.7519 (0.0042) | 52.168°  | 1.7519Å  | 21.3 | 9.6 (0.4)   | 21.3  | 33.1 (2.0)  | 4.8 (0.3)%   | 16.3  | 0.0283   | 0.488v | 2.794 (0.083) | 32    |         |      |
| 5 | 62.810 (0.003) | 1.4783 (0.0001) | 62.810°  | 1.4783Å  | 15.5 | 392.6 (2.5) | 156.1 | 389.0 (3.2) | 56.1 (0.5)%  | 120.8 | 0.0283   | 0.488v | 0.784 (0.003) | 123   | (2 2 0) | Buns |
| 6 | 75.340 (0.005) | 1.2605 (0.0002) | 75.340°  | 1.2605Å  | 18.3 | 132.1 (1.6) | 84.6  | 137.5 (2.1) | 19.8 (0.3)%  | 64.5  | 0.0283   | 0.488v | 0.827 (0.006) | 125   | (3 1 1) | Buns |
| 7 | 79.364 (0.007) | 1.2064 (0.0002) | 79.364°  | 1.2064Å  | 16.8 | 103.7 (1.3) | 78.3  | 121.5 (2.0) | 17.5 (0.3)%  | 60.0  | 0.0283   | 0.488v | 0.934 (0.008) | 113   | (2 2 2) | Buns |

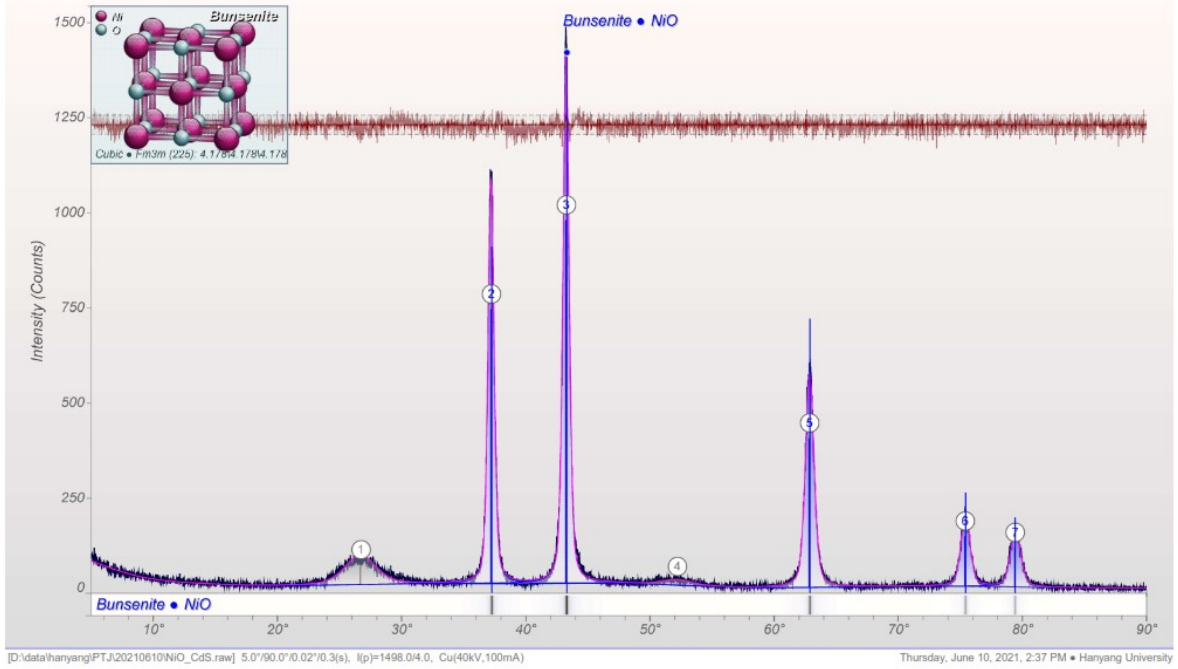

Fig. S4: XRD pattern NiO-CdS

# NiO

| # | Phase ID  | Chemical Formula | PDF-#       | RIR  | FOM (n)  | Scale(I) | Shift(x) | Space Group | a (Å)  | b (Å)  | c (Å)  |
|---|-----------|------------------|-------------|------|----------|----------|----------|-------------|--------|--------|--------|
| 1 | Bunsenite | NiO              | 98-000-0133 | 5.19 | 1.0 (05) | 1.000    | 0.080°   | cFm3m (225) | 4.1780 | 4.1780 | 4.1780 |

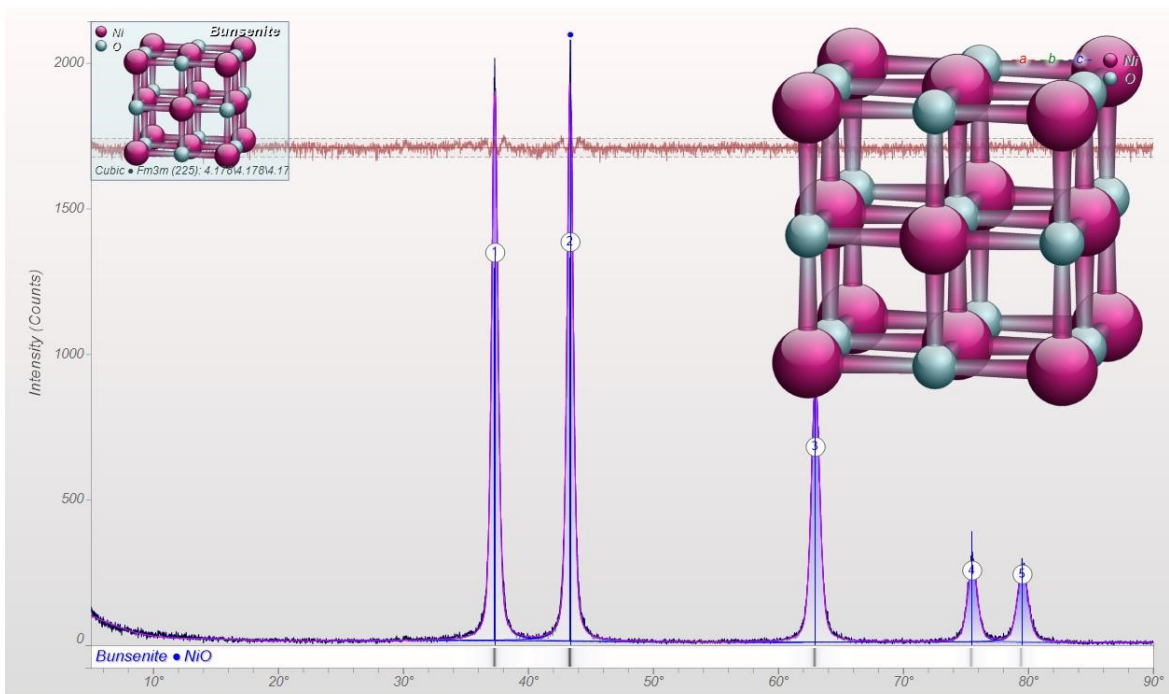

[D:\data\hanyang\PTJ\20210610\NiO.raw] 5.0°/90.0°/0.02°/0.3(s), I(p)=2081.0/2.0, Cu(40kV,100mA) Thursday, June 10, 2021, 1:56 PM • Hanyang University

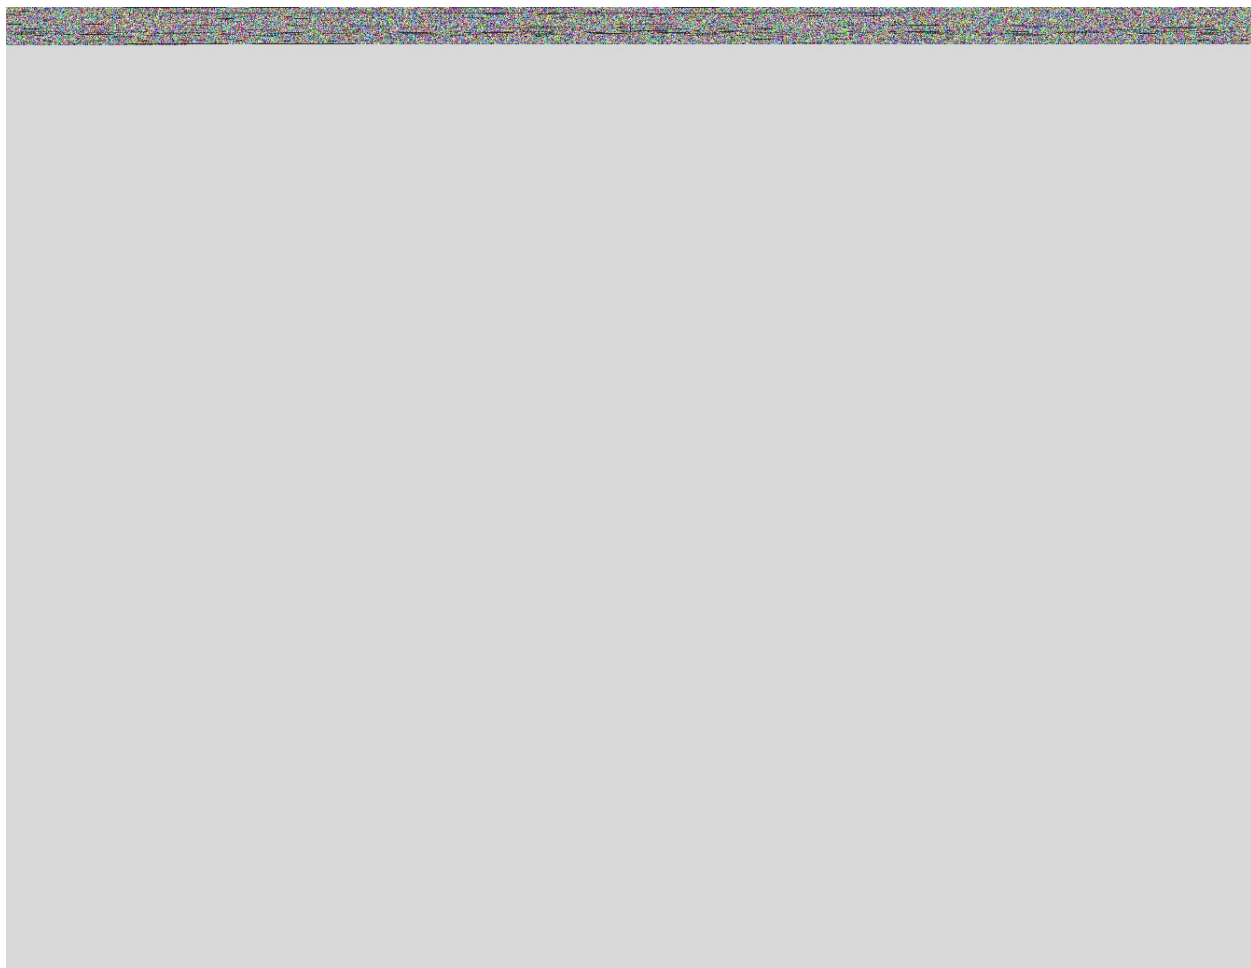

Fig. S5: XRD pattern NiO-CdS.

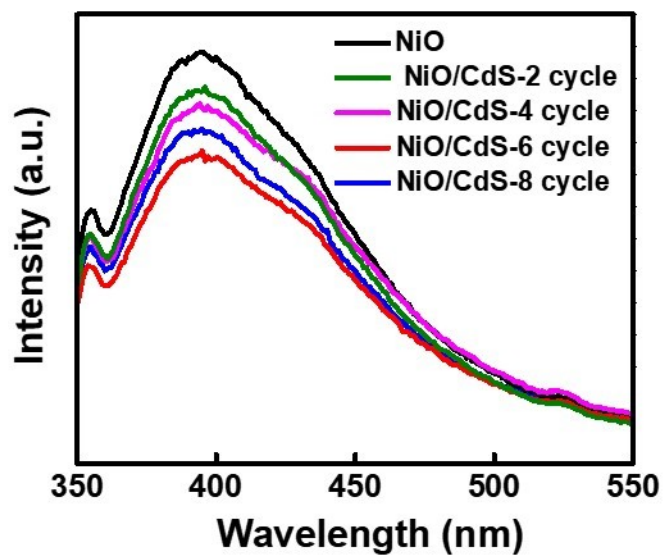

Fig. S6: Photoluminescence spectra of pristine NiO as well as different NiO/CdS p-n heterojunctions.

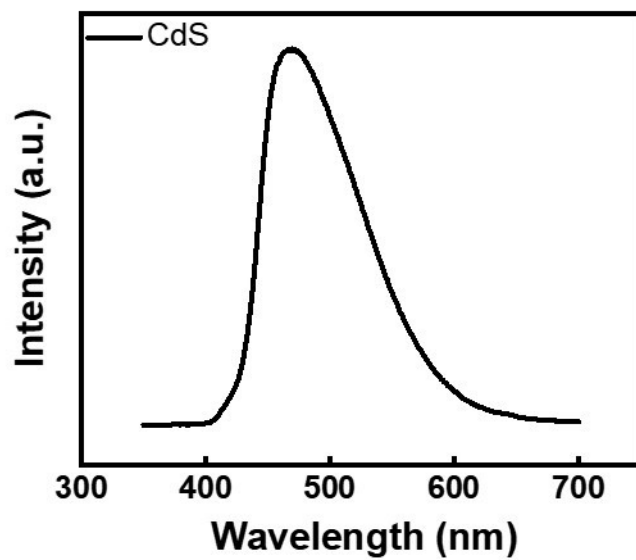

Fig. S7: Photoluminescence spectra of pristine CdS QDs.

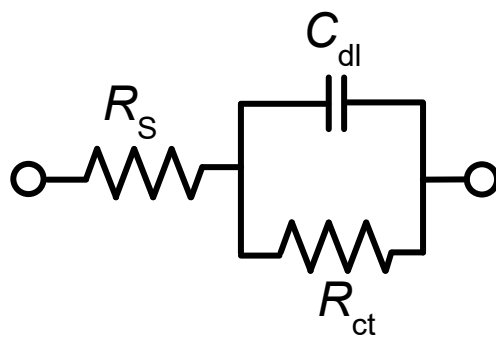

Fig. S8: Equivalent circuit of EIS data.

**Table S1:** Various electrochemical parameters derived from the EIS study.

| <b>Photocatalysts</b> | <b><math>R_s</math> (<math>\Omega</math>)</b> | <b><math>R_{ct}</math> (<math>\Omega</math>)</b> | <b><math>C_{dl}</math> (<math>\mu F</math>)</b> |
|-----------------------|-----------------------------------------------|--------------------------------------------------|-------------------------------------------------|
| NiO                   | 6.22                                          | 9989                                             | 0.733                                           |
| NiO/CdS               | 4.33                                          | 7149                                             | 0.551                                           |
